# Supplementary material for: The Cretaceous physiological adaptation of angiosperms to a declining pCO 2 : a trait-oriented modelling approach
Source: Copernicus journal article supplement (doi:10.5194/bg-2021-139), 2021-06-04
Supplement: Supplementary file 1 [file bg-2021-139-supplement.zip]

# **SI of The Cretaceous physiological adaptation of angiosperms to a declining pCO<sub>2</sub> : a trait-oriented modelling approach**

Julia Bres<sup>1</sup>, Pierre Sepulchre<sup>1</sup>, Nicolas Viovy<sup>1</sup>, and Nicolas Vuichard<sup>1</sup>

<sup>1</sup>Laboratoire des Sciences du Climat et de l'Environnement, LSCE/IPSL, CEA-CNRS-UVSQ, Université Paris-Saclay, 91191 Gif-sur-Yvette, France

**Correspondence:** Julia Bres (julia.bres@lsce.ipsl.fr)

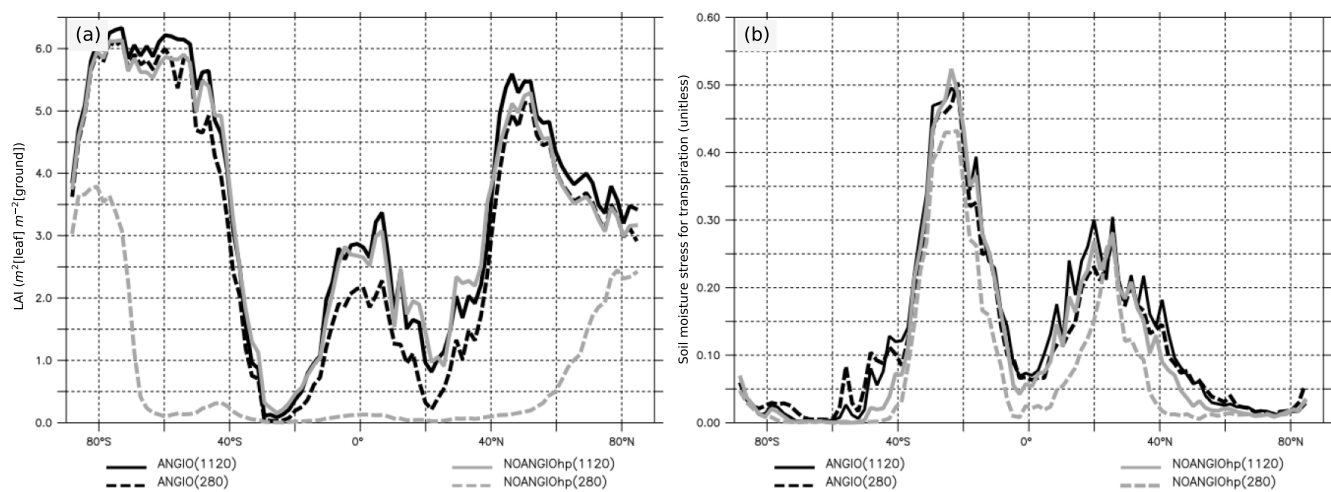

**Figure S 1.** Annual zonal mean of (a) LAI ( $\text{m}^2[\text{leaf}] \text{m}^{-2}[\text{ground}]$ ) and (b) soil moisture stress for transpiration (unitless) for ANGIO(1120) (black line), ANGIO(280) (black dashed line), NOANGIOhp(1120) (gray line) and NOANGIOhp(280) (gray dashed line).

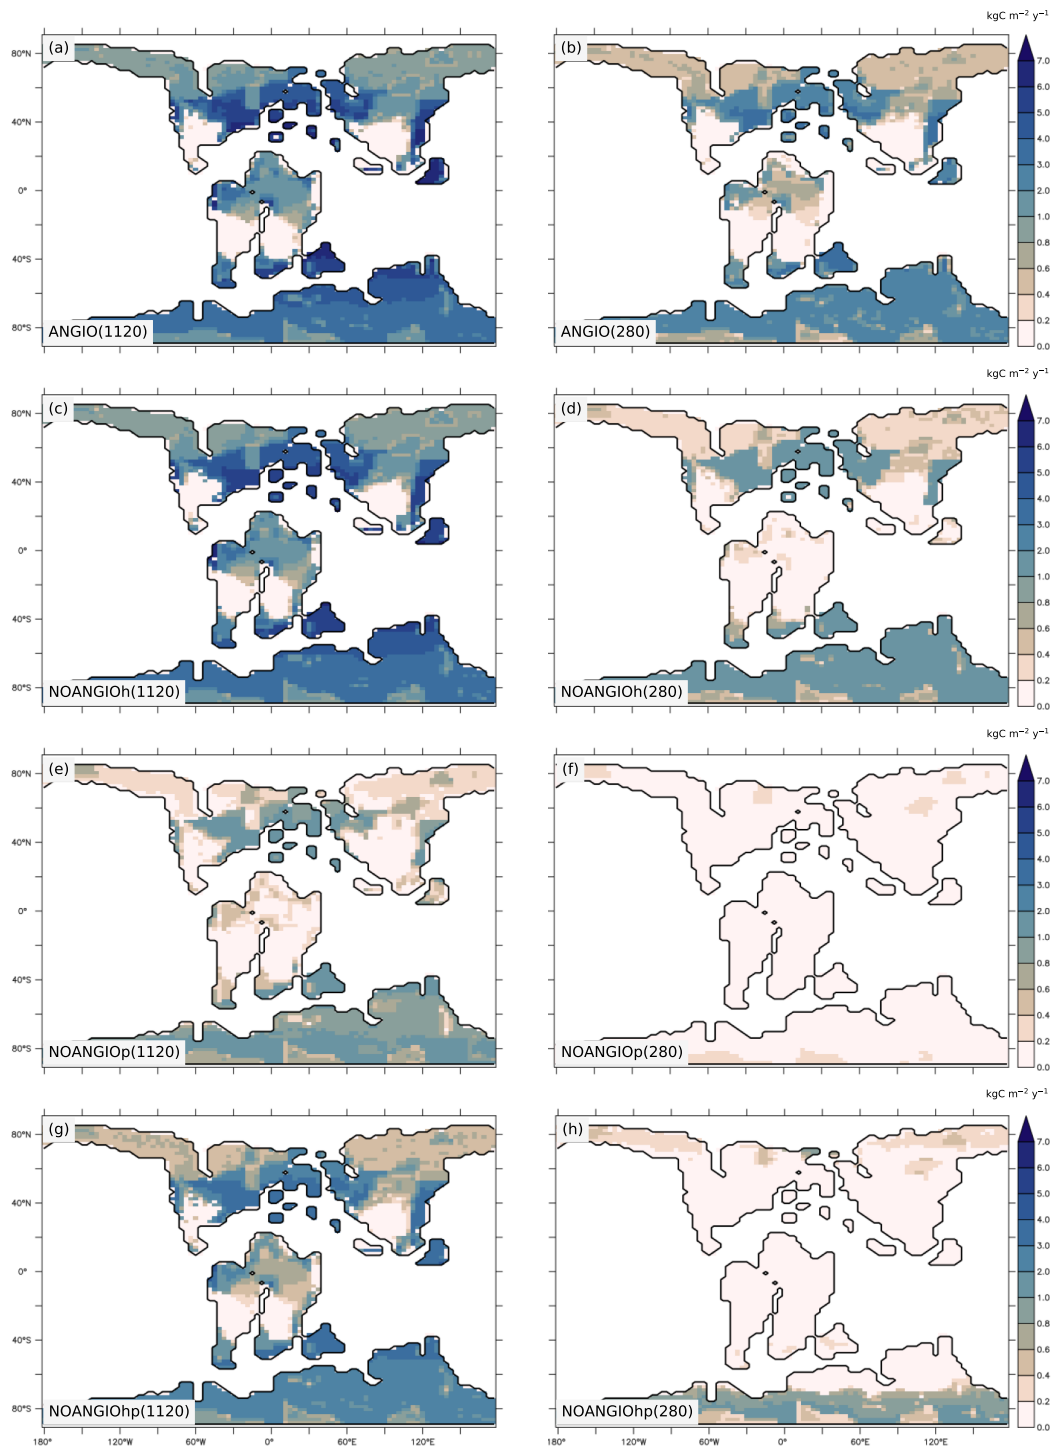

**Figure S 2.** Annual mean GPP ( $\text{kgC m}^{-2} \text{y}^{-1}$ ) for a) ANGIO(1120), b) ANGIO(280), c) NOANGIOh(1120), d) NOANGIOh(280), e) NOANGIOp(1120), f) NOANGIOp(280), g) NOANGIOhp(1120) and h) NOANGIOhp(280).

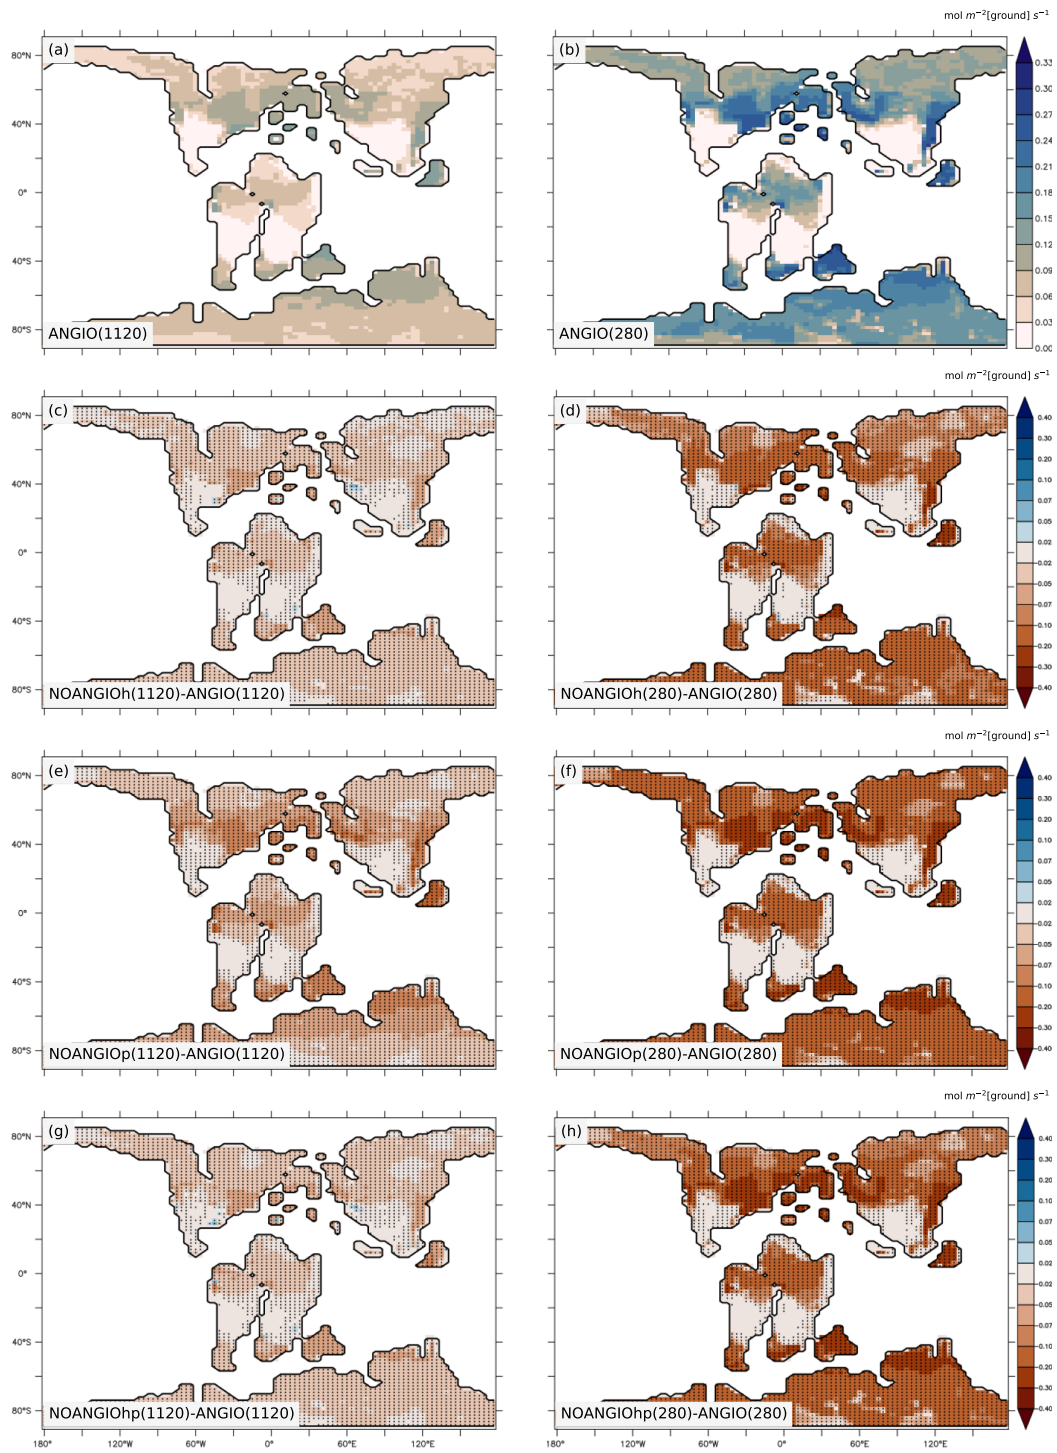

**Figure S 3.** Annual canopy stomatal conductance ( $\text{mol m}^{-2}[\text{ground}] \text{s}^{-1}$ ) for a) ANGIO(1120) and b) ANGIO(280), anomalies of annual mean canopy stomatal conductance ( $\text{mol m}^{-2}[\text{ground}] \text{s}^{-1}$ ) for c) NOANGIOh(1120) vs ANGIO(1120), d) NOANGIOh(280) vs ANGIO(280), e) NOANGIOp(1120) vs ANGIO(1120), f) NOANGIOp(280) vs ANGIO(280), g) NOANGIOhp(1120) vs ANGIO(1120) and h) NOANGIOhp(280) vs ANGIO(280). The t-test 95 % confidence level anomalies are given by dots.

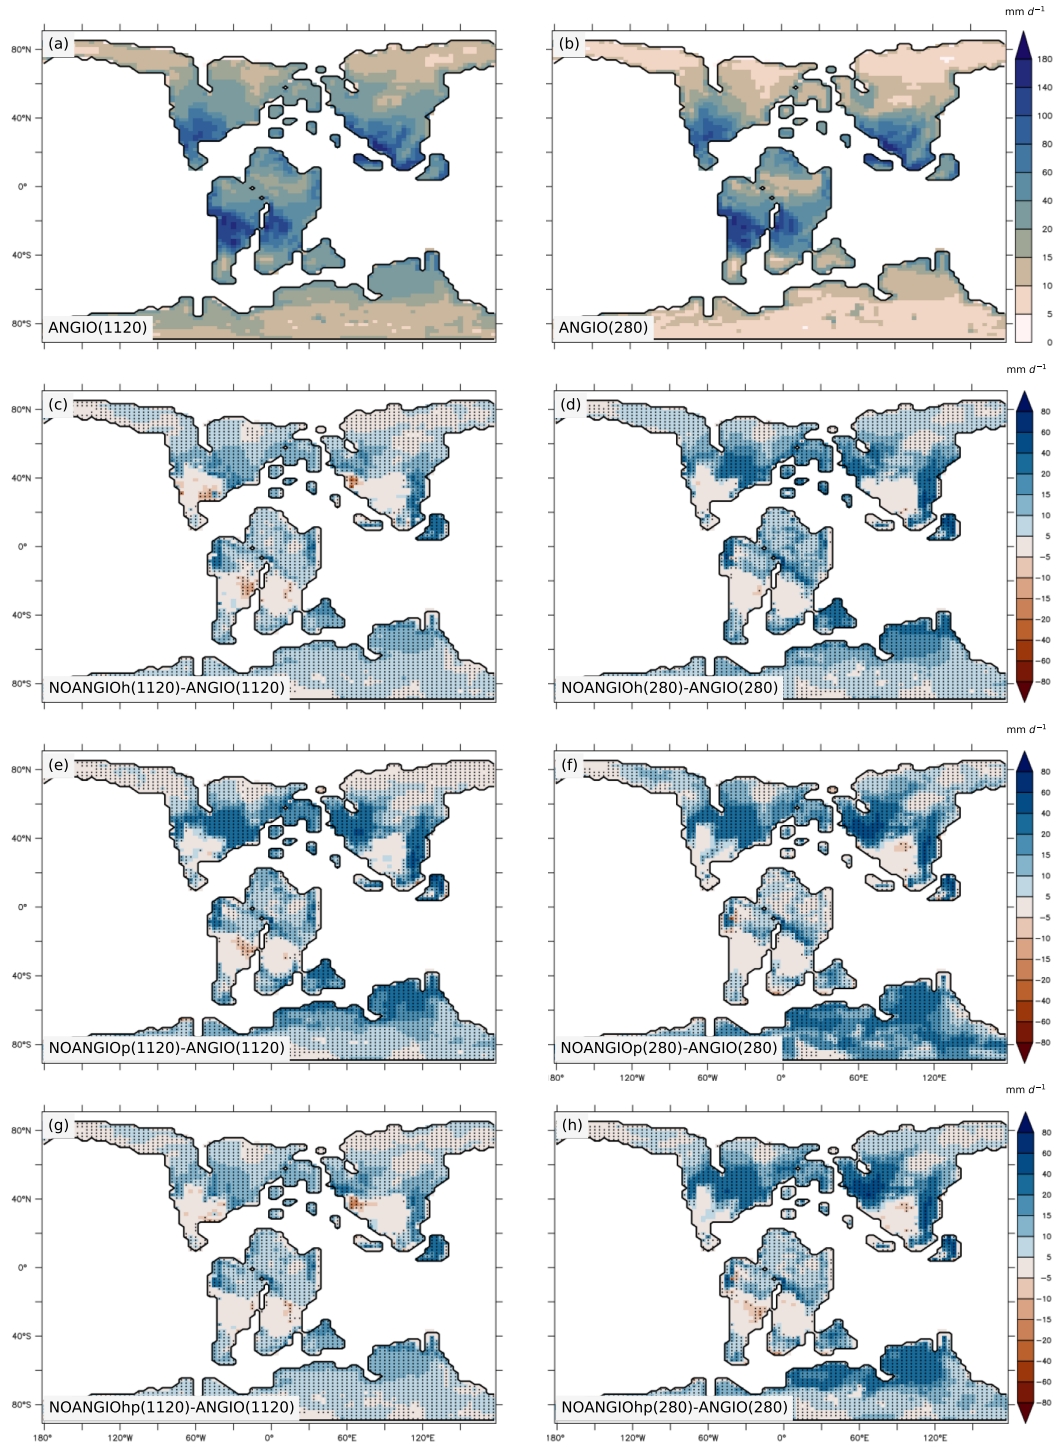

**Figure S 4.** Annual mean potential evaporation ( $\text{mm d}^{-1}$ ) for a) ANGIO(1120) and b) ANGIO(280), anomalies of annual mean potential evaporation ( $\text{mm d}^{-1}$ ) for c) NOANGIOh(1120) vs ANGIO(1120), d) NOANGIOh(280) vs ANGIO(280), e) NOANGIOp(1120) vs ANGIO(1120), f) NOANGIOp(280) vs ANGIO(280), g) NOANGIOhp(1120) vs ANGIO(1120) and h) NOANGIOhp(280) vs ANGIO(280). The t-test 95 % confidence level anomalies are given by dots.
