# Supplementary material for: The Cretaceous physiological adaptation of angiosperms to a declining pCO 2 : a trait-oriented modelling approach
Source: Copernicus journal article supplement (doi:10.5194/bg-2021-139), 2021-06-04
Supplement: Supplementary file 1 [file TableS2.docx]

|  |  | Bare ground | tropical broad-leaved evergreen | tropical broad-leaved raingreen | temperate needleleaf evergreen | temperate broadleaved evergreen | temperate broad-leaved summergreen | boreal needleleaf evergreen | boreal broad-leaved summergreen | boreal needleleaf summergreen | C3 grass |
| --- | --- | --- | --- | --- | --- | --- | --- | --- | --- | --- | --- |
|  | Mask value | **1** | **2** | **3** | **4** | **5** | **6** | **7** | **8** | **9** | **10** |
| **High altitude/latitude evergreen conifer closed canopy forest** |  |  |  |  | 100 |  |  |  |  |  |  |
| **Closed canopy, broad leaved, moist evergreen forest** | 10 |  | 100 |  |  |  |  |  |  |  |  |
| **High altitude/latitude mixed forest with equal percentage broad vs needleleaf and evergreen vs deciduous** | 6 |  |  |  | 50 |  | 50 |  |  |  |  |
| Low altitude/latitude evergreen conifer closed canopy forest |  |  |  |  | 100 |  |  |  |  |  |  |
| **Closed canopy, broad leaved, dry deciduous forest** | 11 |  |  | 100 |  |  |  |  |  |  |  |
| **Savanna: dry, low understory with sparse broad leaved overstory** | 12 |  |  | 10 |  |  |  |  |  |  | 90 |
| **High altitude/latitude moist, open canopy evergreen forest with shrub understory** | 15 |  |  |  |  |  |  |  |  |  |  |
| **Low altitude/latitude moist, open canopy, mixed evergreen/decidous, forest with shrub understory** | 16 |  | 35 | 35 |  |  |  |  |  |  | 30 |
| **Dry or warm shrubland (deciduous)** | 21 | 30 |  | 30 |  |  |  |  |  |  | 40 |
| **Wet or cool shrubland (evergreen)** |  |  | 100 |  |  |  |  |  |  |  |  |

Carte de PFTs créée sur asterix.

/home/climwork/psepul/BC_CM5A2/BC_SRF/115Ma/REALISTIC_PFTs/SEWALL/

ncap2 -S create_paleopft.nco veget_Albien_Sewall_with_mask.nc result.nc
